# Supplementary material for: Comparison between generations of foams and single vertical films – single and mixed surfactant systems
Source: Royal Society of Chemistry journal article supplement (doi:10.1039/c4sm00326h), 2014-01-01
Supplement: c4sm00326h1.pdf [file c4sm00326h1.pdf]

## Appendix A

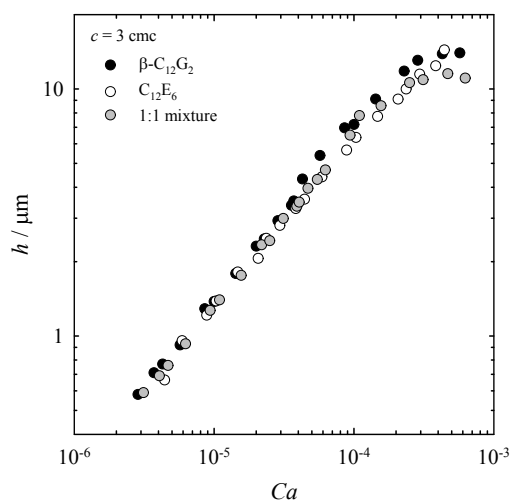

**Figure A1:** Thickness of the Frankel zone plotted versus the capillary number  $Ca$  of vertical foam films stabilized by  $\beta\text{-C}_{12}\text{G}_2$ ,  $\text{C}_{12}\text{E}_6$  and their 1:1 mixture at  $c = 3 \text{ cmc}$ . The error bar is of the size of the symbols.
